# Supplementary material for: RegEl corpus: identifying DNA regulatory elements in the scientific literature
Source: Oxford University Press journal article supplement (doi:10.1093/database/baac043), 2022-01-01
Supplement: baac043_supp.zip [file baac043_supp.zip]

Archive with 1 entries (1 files):
- supplementary_material.pdf
